# Supplementary material
Source: PubMed Central journal article supplement (PMC3660407)

**Table S1. Binding of select IgG samples to human FCRL3, CD16A and CD32B/C by Biacore.**

| Protein on sensor | Ig sample <sup>1</sup>    | KD ( $\mu$ M) <sup>2</sup> | Binding model |
|-------------------|---------------------------|----------------------------|---------------|
| FCRL3             | #1 IgG1                   | No binding                 | -             |
| FCRL3             | #2 IgG2                   | No binding                 | -             |
| FCRL3             | #3 IgG3                   | Weak binding <sup>3</sup>  | -             |
| FCRL3             | #4 IgG4                   | No binding                 | -             |
| FCRL3             | IgG-Fc                    | No binding                 | -             |
| FCRL3             | IgG-F(ab') <sub>2</sub>   | No binding                 | -             |
| CD16A             | #1 IgG1                   | 3.6                        | Steady-state  |
| CD16A             | IgG-Fc                    | 3.5                        | Steady-state  |
| CD16A             | IgG-F(ab') <sub>2</sub>   | No binding                 | -             |
| CD16A             | IVIg with SA <sup>4</sup> | 2.7                        | Steady-state  |
| CD16A             | IVIg lacking SA           | 4.6                        | Steady-state  |
| CD32B/C           | #1 IgG1                   | 12.9                       | Steady-state  |
| CD32B/C           | IgG-Fc                    | 7.2                        | Steady-state  |
| CD32B/C           | IgG-F(ab') <sub>2</sub>   | No binding                 | -             |
| CD32B/C           | IVIg with SA              | 8.0                        | Steady-state  |
| CD32B/C           | IVIg lacking SA           | 10.0                       | Steady-state  |

<sup>1</sup> Numbering of full IgG samples follows that in Table 1.

<sup>2</sup> With CD16A and CD32B/C, KD was determined using steady-state analysis, due to the fast kinetics.

<sup>3</sup> Due to weak binding, KD could not be reliably established.

<sup>4</sup> SA, sialic acid.

## SUPPLEMENTAL FIGURE LEGENDS

### **Fig. S1. Binding of additional IgG samples to recombinant FCRL5.**

Representative binding curves are shown for samples 5-18 (Table 1). Biacore was performed as indicated under Fig. 1. KD values are shown, in parenthesis indicating FCRL5 densities on the sensor in relative units. The y-axes are scaled to allow assessment of details, and are not proportional to FCRL5 density.

### **Fig. S2. Binding of IgG samples at an additional FCRL5 density, or using alternate data fits.**

Biacore was performed as indicated under Fig. 1. (A) For samples 1-4 (Table 1), the same binding curves shown on Fig. 1a were fitted using 1:1 binding model. KD values are not provided, as fits were poor. (B) Representative binding of samples 2 and 4 (Table 1) is shown at FCRL5 densities (indicated in parenthesis) different from those shown on Fig. 1. Fits were obtained using two-state binding model for sample 2; 1:1 binding model for sample 4.

### **Fig. S3. Sample purities assessed by protein staining and Western blotting.**

(A,B) Purities of recombinant FCRL5-His (1  $\mu$ g protein) and modified IgG samples (2  $\mu$ g protein) used in Biacore studies shown on Fig. 4 were assessed by non-reduced and reduced SDS-PAGE analysis, followed by protein staining. (B) Purification of the IgG1-Fab-Fc fragment is shown. On the left, fractions from the second Superdex200 column were assessed by non-reduced SDS-PAGE analysis, followed by protein staining, indicating the identity of bands (see *Materials and Methods* for details). On the right, purity of the final IgG1-Fab-Fc fragment used

in Biacore studies. (C) Sialic acid content of IVIg samples (1  $\mu$ g protein) eluted from or not binding to (flow through) *Sambucus nigra* agglutinin column was assessed by Western blot analysis (using reduced SDS-PAGE), blotting with *Sambucus nigra* agglutinin. Note that slower mobility of the H-chain in the eluted samples likely reflects differences in glycosylation.

**Fig. S1**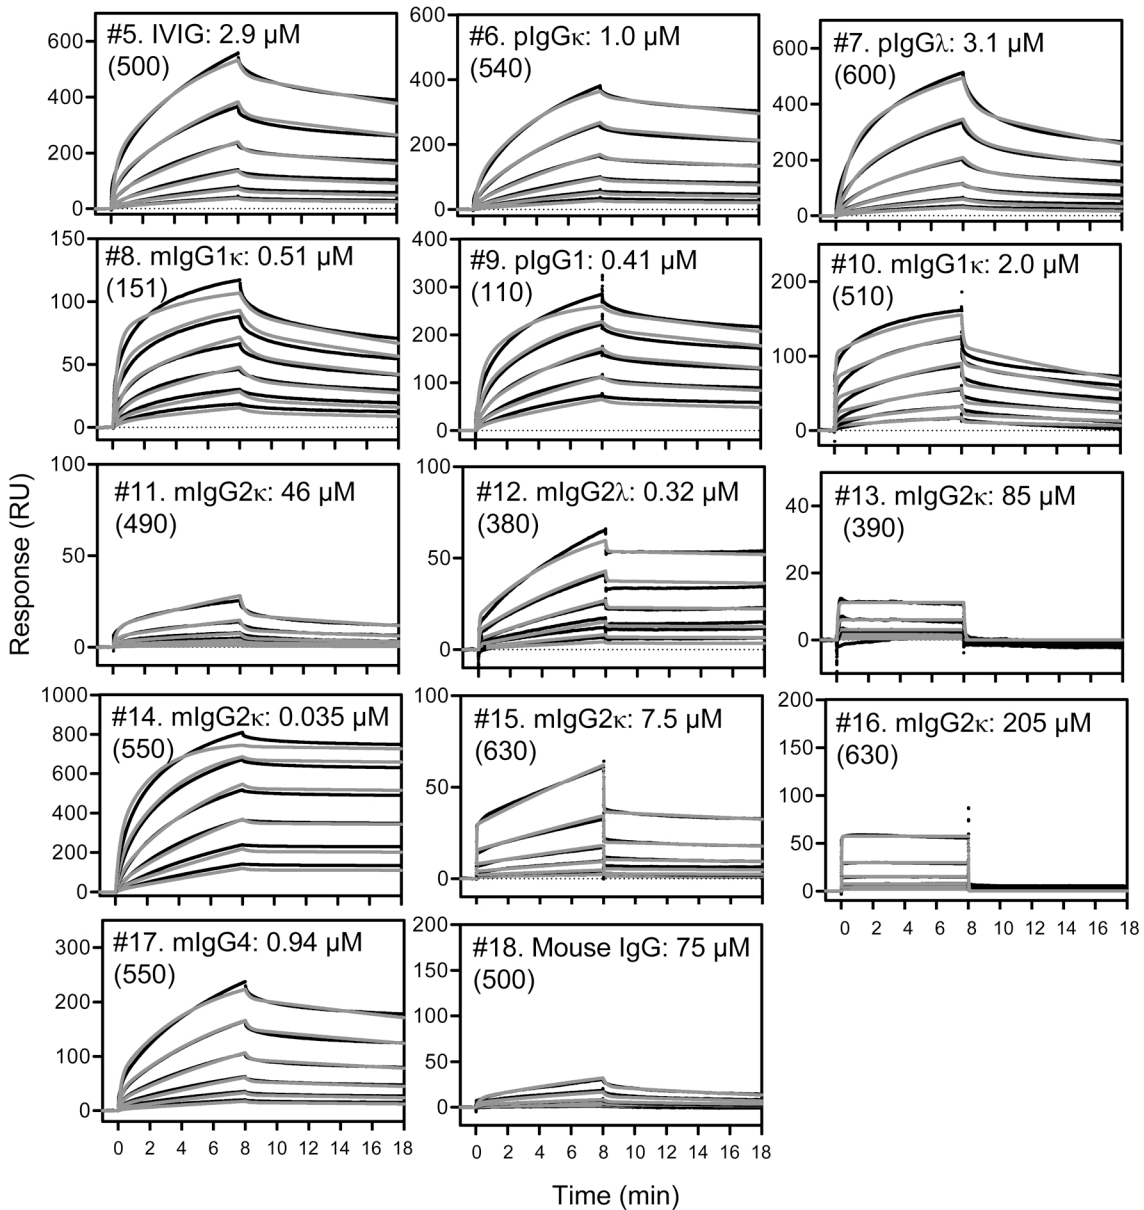

**Fig. S2**

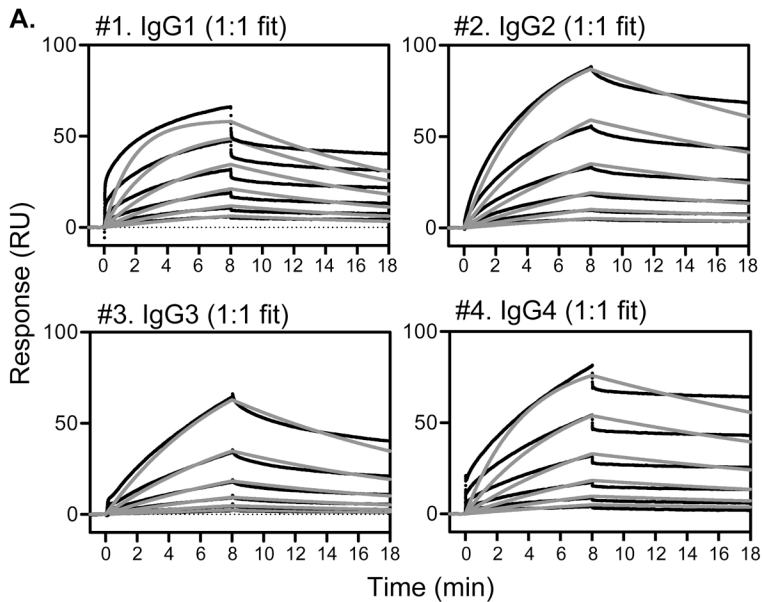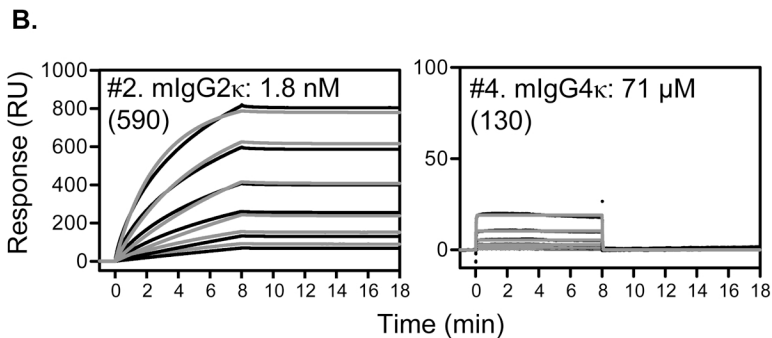

**Fig. S3.**

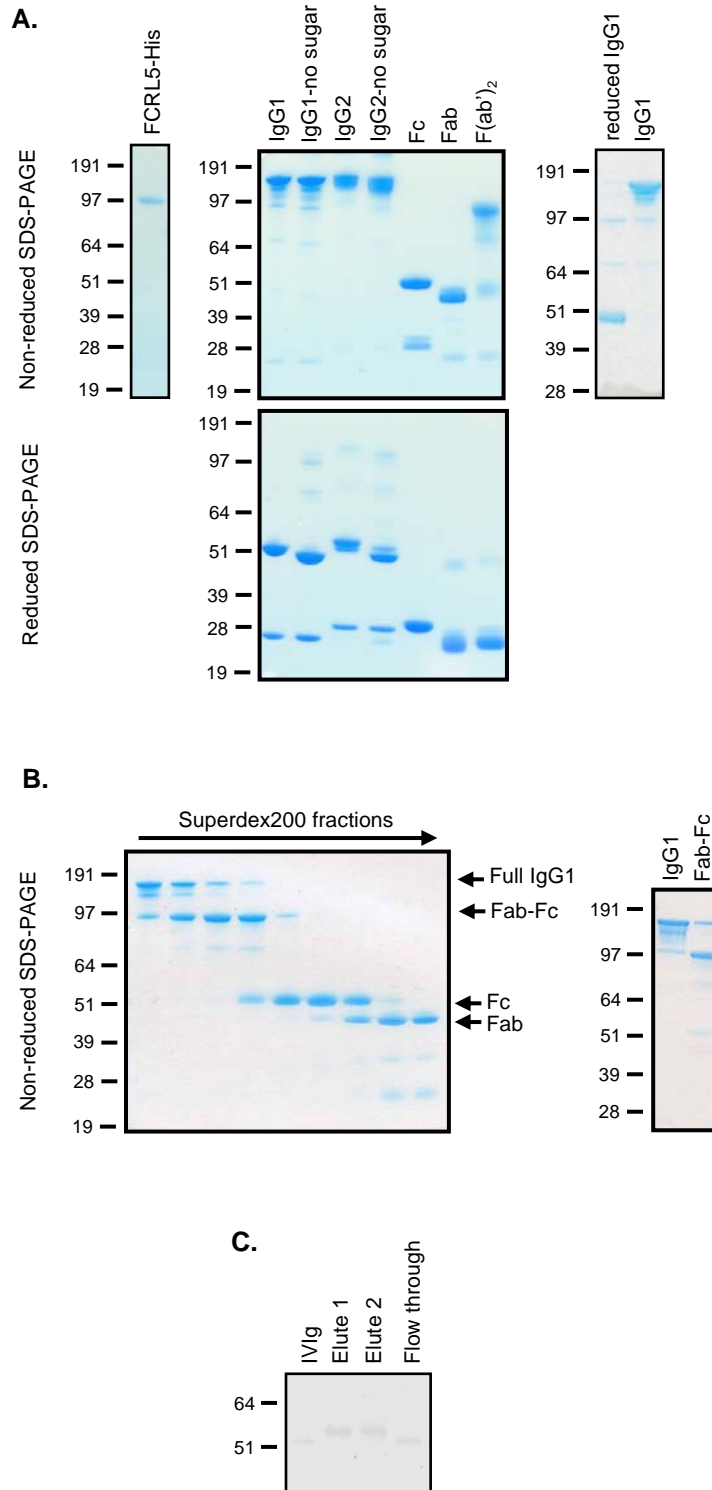

Supplement: NIHMS459993-supplement-1.pdf [file NIHMS459993-supplement-1.pdf]
